# Supplementary material for: Effective photosensitized emission of a Tb(iii) complex using a β-diketonate photosensitizer and an oxygen barrier system in a thermally populated triplet state
Source: Royal Society of Chemistry journal article supplement (doi:10.1039/d4dt00286e), 2024-01-01
Supplement: d4dt00286e1.pdf [file d4dt00286e1.pdf]

## **Effective photosensitized emission of a Tb(III) complex using a $\beta$ -diketonate photosensitizer and an oxygen barrier system in a thermally populated triplet state**

Kota Inage<sup>a</sup>, Mengfei Wang<sup>b,c</sup>, Yasuchika Hasegawa<sup>b,c\*</sup>, Yuichi Kitagawa<sup>b,c\*</sup>

- a. Graduate School of Chemical Sciences and Engineering, Hokkaido University, Sapporo 060-8628, Japan.
- b. Faculty of Engineering, Hokkaido University, Sapporo 060-8628, Japan.
- c. Institute for Chemical Reaction Design and Discovery (WPI-ICReDD), Hokkaido University, Sapporo 001-0021, Japan.

E-mail: y-kitagawa@eng.hokudai.ac.jp; hasegaway@eng.hokudai.ac.jp

## Structure

To estimate the coordination geometries of the complexes, we performed continuous shape measure (CShM) using SHAPE.<sup>1-3</sup> The CShM factor  $S$  for  $N$  atoms coordination was expressed as follows:

$$S = \min \frac{\sum_{i=1}^N |Q_i - P_i|^2}{\sum_{i=1}^N |Q_i - Q_0|^2} \times 100$$

where  $Q_i$  is the position vectors of the coordination atoms,  $P_i$  is the position vector of an ideal structure, and  $Q_0$  is the position vector of the center of mass.

**Table S1.** The CShM factor  $S$  for the Tb(III) and Gd(III) complexes.

| Entry                                       | $S$ (SAPR) <sup>[a]</sup> | $S$ (TDH) <sup>[b]</sup> | $S$ (BTPR) <sup>[c]</sup> |
|---------------------------------------------|---------------------------|--------------------------|---------------------------|
| [Tb(hfa) <sub>3</sub> (tppo) <sub>2</sub> ] | 0.756                     | 1.118                    | 1.558                     |
| [Tb(hfa) <sub>3</sub> (tcpo) <sub>2</sub> ] | 1.233                     | 1.504                    | 1.150                     |
| [Gd(hfa) <sub>3</sub> (tppo) <sub>2</sub> ] | 0.839                     | 1.086                    | 1.564                     |
| [Gd(hfa) <sub>3</sub> (tcpo) <sub>2</sub> ] | 1.296                     | 1.499                    | 1.155                     |

[a] Square antiprism. [b] Trigonal dodecahedron. [c] Bicapped trigonal prism.

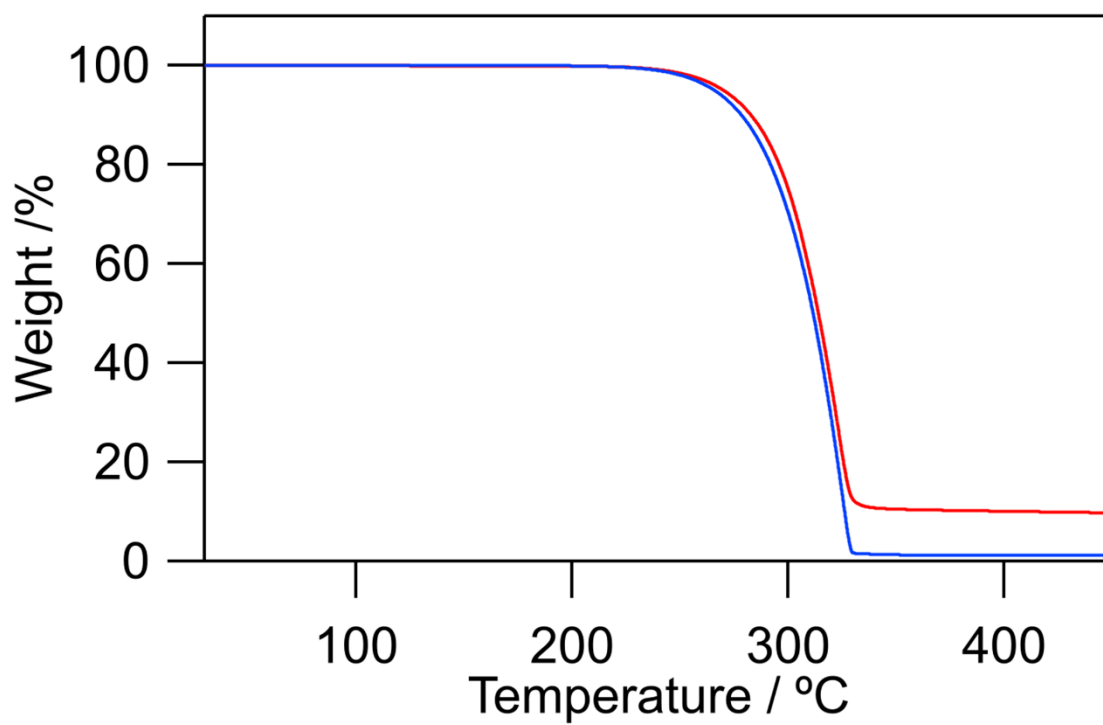

**Figure S1.** Thermogravimetric analysis profiles of [Tb(hfa)<sub>3</sub>(tppo)<sub>2</sub>] (red line) and [Tb(hfa)<sub>3</sub>(tcpo)<sub>2</sub>] (blue line) under nitrogen atmosphere at a heating rate of 5°C min<sup>-1</sup>.

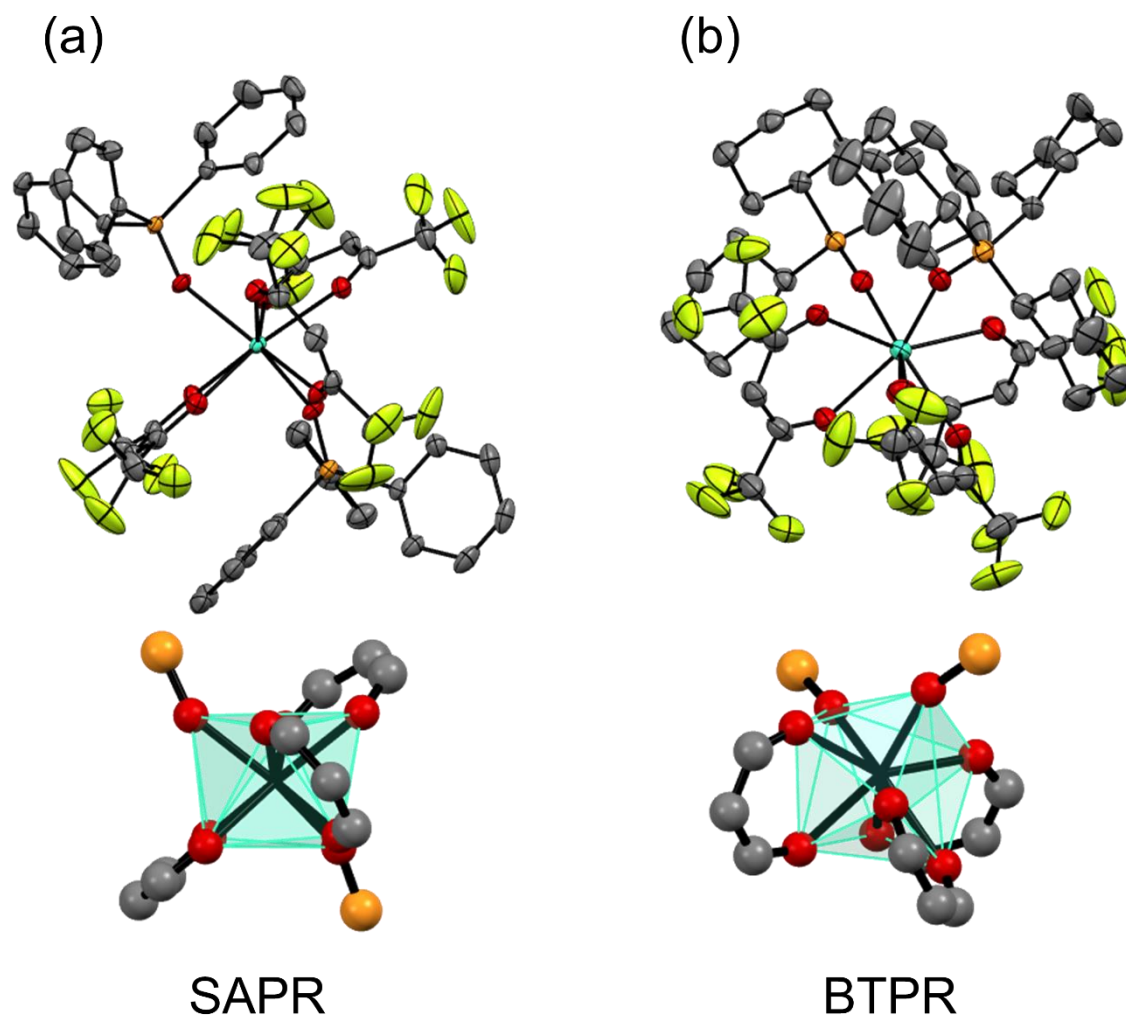

**Figure S2.** ORTEP drawings (top) and coordination geometries (bottom) of the Gd(III) complexes: (a)  $[\text{Gd}(\text{hfa})_3(\text{tppo})_2]$ , (b)  $[\text{Gd}(\text{hfa})_3(\text{tcpo})_2]$ . Ellipsoids probability was set at 50%. Hydrogen atoms are omitted for clarity.

**Table S2.** Crystal data of [Gd(hfa)<sub>3</sub>(tppo)<sub>2</sub>] and [Gd(hfa)<sub>3</sub>(tcpo)<sub>2</sub>].

|                              | [Gd(hfa) <sub>3</sub> (tppo) <sub>2</sub> ]                                     | [Gd(hfa) <sub>3</sub> (tcpo) <sub>2</sub> ]                                     |
|------------------------------|---------------------------------------------------------------------------------|---------------------------------------------------------------------------------|
| Chemical formula             | C <sub>51</sub> H <sub>33</sub> F <sub>18</sub> GdO <sub>8</sub> P <sub>2</sub> | C <sub>51</sub> H <sub>69</sub> F <sub>18</sub> GdO <sub>8</sub> P <sub>2</sub> |
| Molecular weight             | 1334.96                                                                         | 1371.25                                                                         |
| Crystal system               | monoclinic                                                                      | orthorhombic                                                                    |
| Space group                  | <i>P2</i> <sub>1</sub> / <i>n</i>                                               | <i>Pca2</i> <sub>1</sub>                                                        |
| <i>a</i> / Å                 | 17.0506(4)                                                                      | 17.8798(6)                                                                      |
| <i>b</i> / Å                 | 15.4096(3)                                                                      | 18.7861(6)                                                                      |
| <i>c</i> / Å                 | 20.5780(5)                                                                      | 17.3285(5)                                                                      |
| <i>α</i> / °                 | 90                                                                              | 90                                                                              |
| <i>β</i> / °                 | 93.800(2)                                                                       | 90                                                                              |
| <i>γ</i> / °                 | 90                                                                              | 90                                                                              |
| Volume / Å <sup>3</sup>      | 5394.8(2)                                                                       | 5820.5(3)                                                                       |
| <i>Z</i>                     | 4                                                                               | 4                                                                               |
| Density / g cm <sup>-1</sup> | 1.644                                                                           | 1.565                                                                           |
| Temperature / °C             | -150                                                                            | -150                                                                            |
| <i>R</i> <sub>1</sub>        | 0.0323                                                                          | 0.0480                                                                          |
| <i>wR</i> <sub>2</sub>       | 0.0785                                                                          | 0.1326                                                                          |

**Table S3.** Tb-O distances of [Tb(hfa)<sub>3</sub>(tppo)<sub>2</sub>].

| Ligand | Tb–O distance / Å |
|--------|-------------------|
| hfa1   | 2.401             |
|        | 2.397             |
| hfa2   | 2.428             |
|        | 2.333             |
| hfa3   | 2.399             |
|        | 2.339             |
| Avg.   | 2.383             |

**Table S4.** Tb-O distances of [Tb(hfa)<sub>3</sub>(tcpo)<sub>2</sub>].

| Ligand | Tb–O distance / Å |
|--------|-------------------|
| hfa1   | 2.428             |
|        | 2.399             |
| hfa2   | 2.414             |
|        | 2.372             |
| hfa3   | 2.447             |
|        | 2.378             |
| Avg.   | 2.407             |

### Estimation of radiative rate constant $k_r$

The radiative rate constant  $k_r$  of a lanthanide(III) ion can be determined using the following Strickler–Berg equation:<sup>4</sup>

$$k_r = 2303 \times \frac{8\pi cn^2 \tilde{\nu}(2J + 1)}{N_A (2J' + 1)} \int \epsilon(\tilde{\nu}) d\tilde{\nu}$$

where  $c$ ,  $n$ ,  $\tilde{\nu}$ , and  $N_A$  denote the light speed, refractive index, wavenumber, and Avogadro constant, respectively. Meanwhile,  $J$  and  $J'$  are the total angular momentum of the initial and final 4f-electronic states, respectively. However, the emission spectra in the solution state are different from those in the solid state, thus indicating the different electronic structure of the Tb(III) complexes in the solid and solution states (Figure S3). In addition, the signal-to-noise ratio of the absorption spectra in the  ${}^7F_6 \rightarrow {}^5D_4$  transition in Tb(III) is large and thus could not be used to determine the exact  $k_r$  value in solution states (Figure S4).

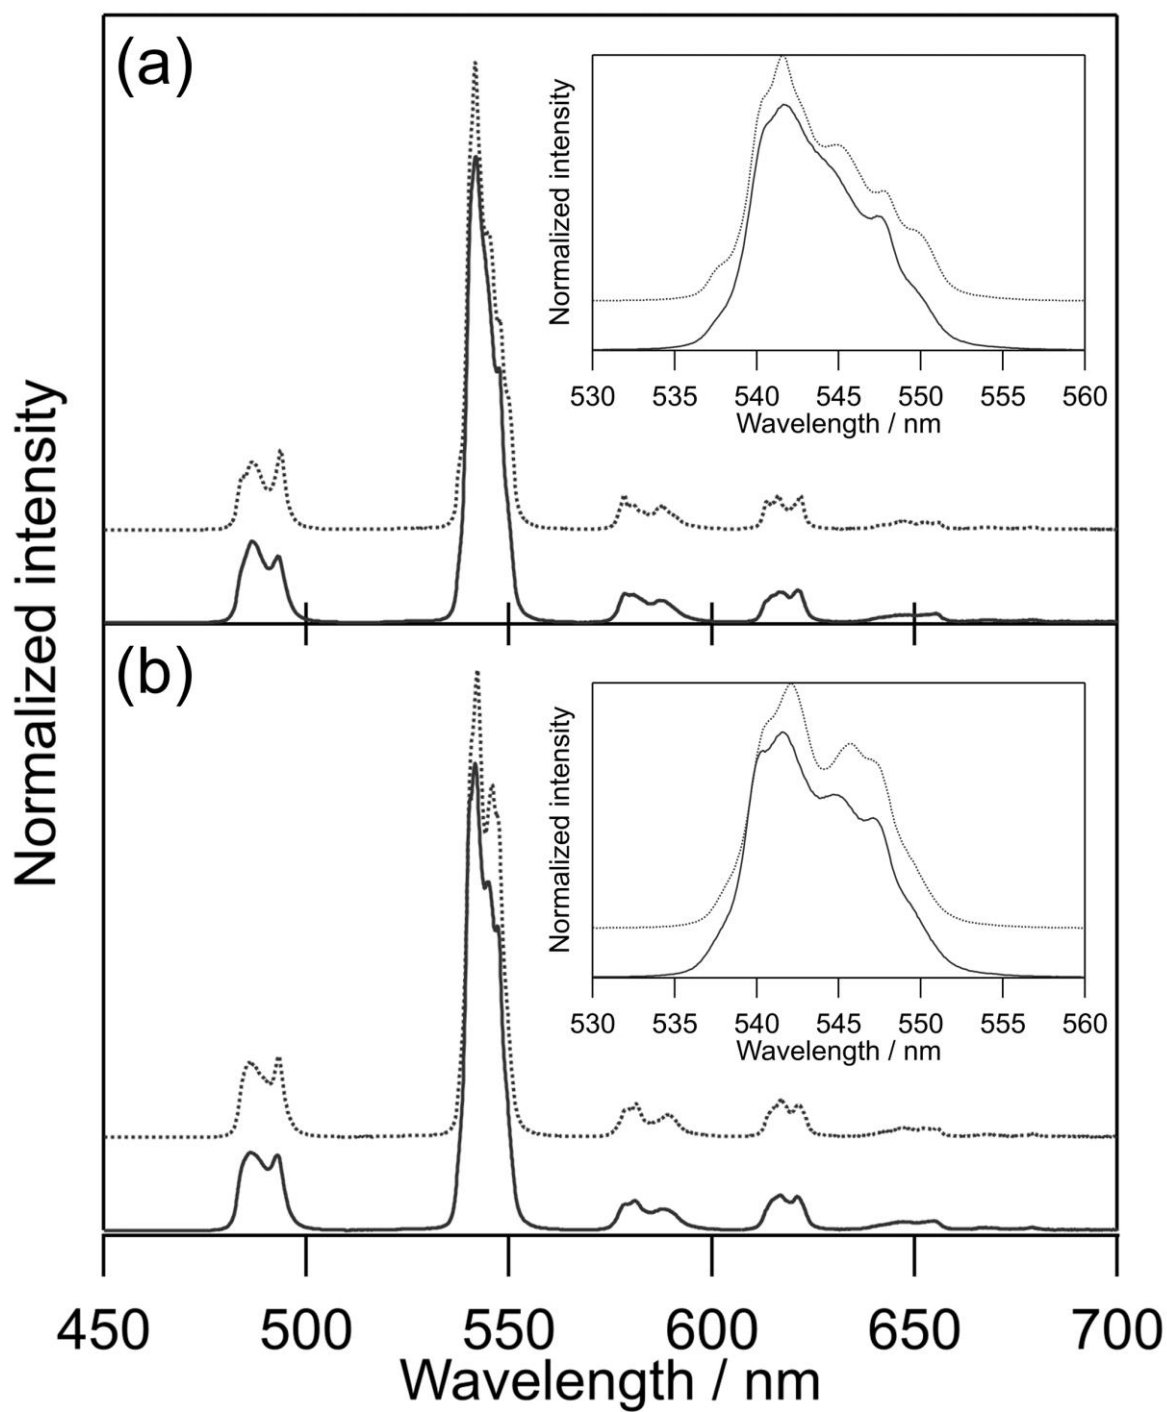

**Figure S3.** Emission spectra ( $\lambda_{\text{ex}} = 360 \text{ nm}$ ,  $293 \text{ K}$ ) of (a)  $[\text{Tb}(\text{hfa})_3(\text{tppo})_2]$  and (b)  $[\text{Tb}(\text{hfa})_3(\text{tcpo})_2]$  in solid (dotted lines) and solution (solid lines, 1 mM in  $\text{CHCl}_3$ ).



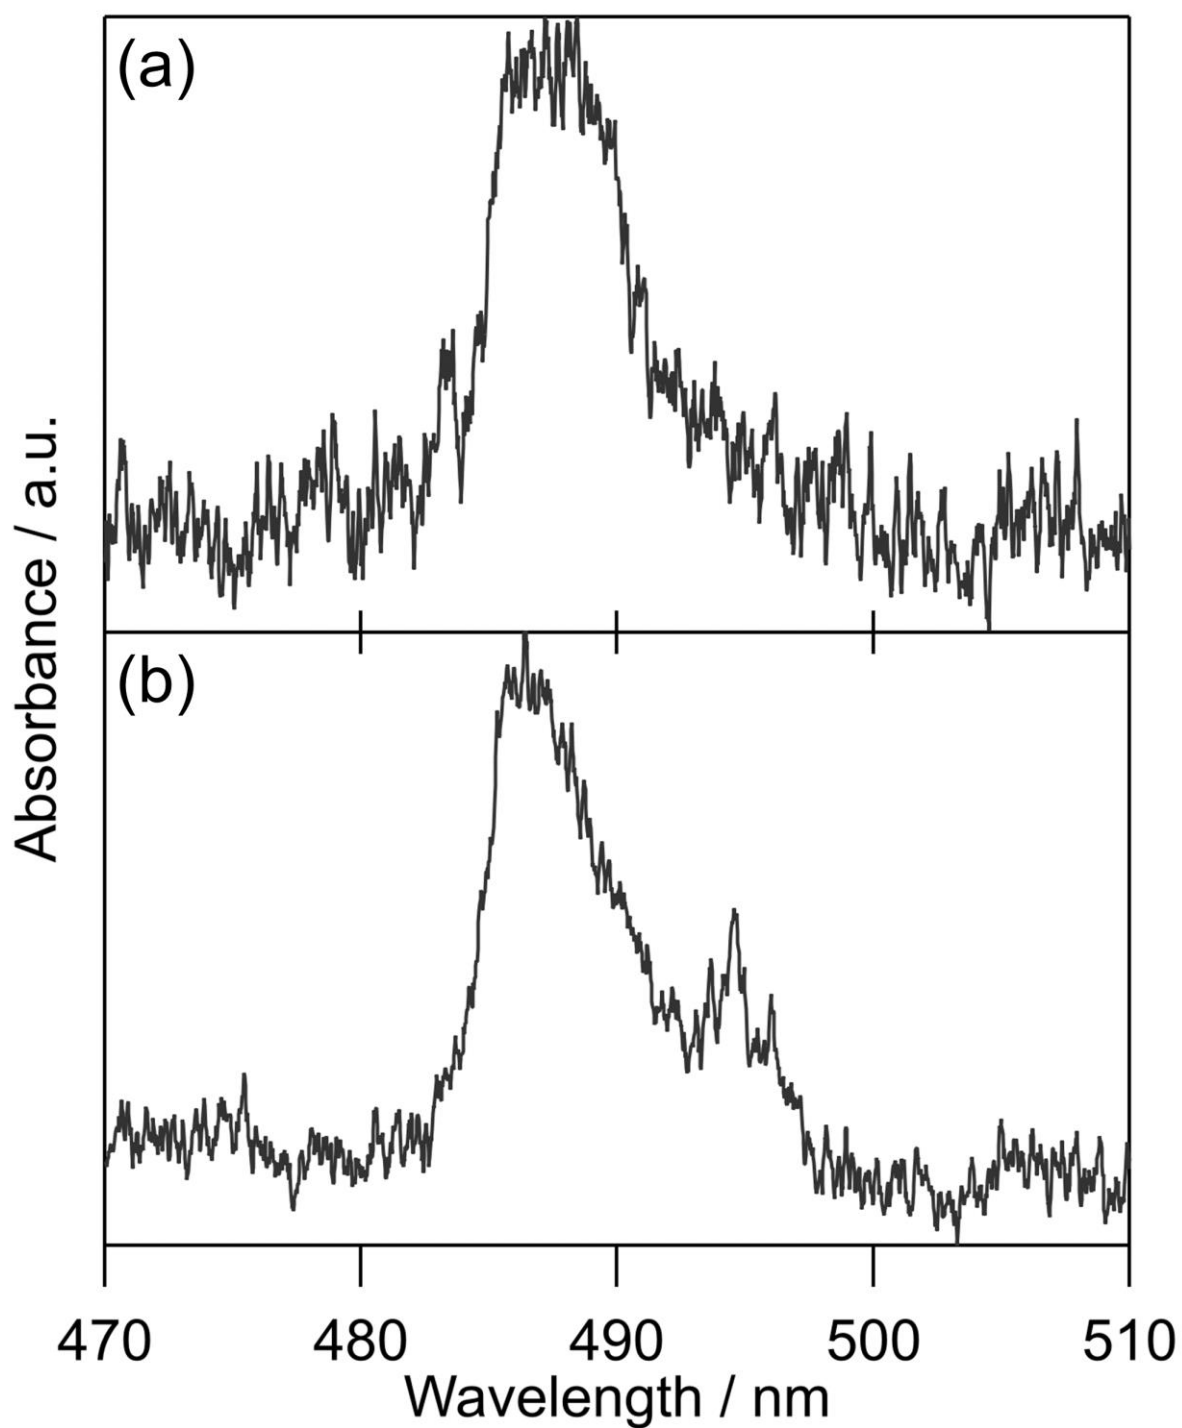

**Figure S4.** Electronic absorption bands of Tb(III) ions in the Tb(III) complexes: (a) [Tb(hfa)<sub>3</sub>(tppo)<sub>2</sub>] (5 mM in CHCl<sub>3</sub>) and (b) [Tb(hfa)<sub>3</sub>(tcpo)<sub>2</sub>] (20 mM in CHCl<sub>3</sub>) at 293 K.

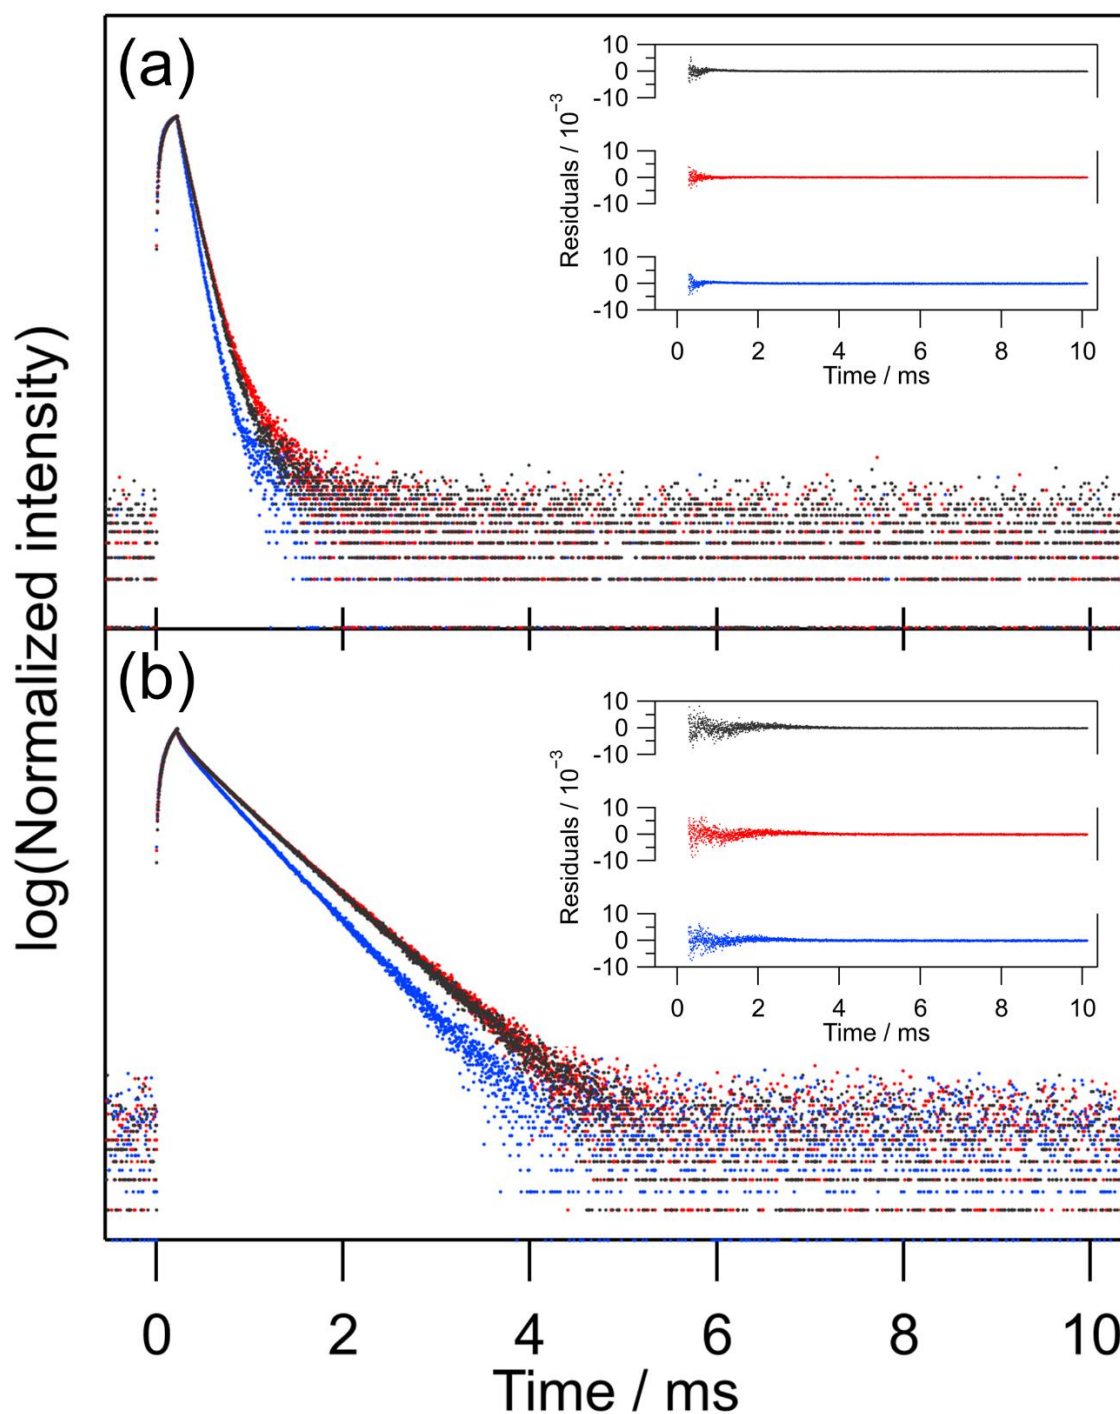

**Figure S5.** Emission decay curves ( $\lambda_{\text{ex}} = 356 \text{ nm}$ ,  $\lambda_{\text{em}} = 542 \text{ nm}$ , 293 K) of (a)  $[\text{Tb}(\text{hfa})_3(\text{tppo})_2]$  and (b)  $[\text{Tb}(\text{hfa})_3(\text{tcpo})_2]$  under air (black dots), vacuum (red dots), and  $\text{O}_2$  (blue dots) conditions (HORIBA Fluorolog-3). The inset figures represent the residuals of double-exponential fitting (Chi-squared test:  $[\text{Tb}(\text{hfa})_3(\text{tppo})_2]$ :  $\chi^2 = 0.000378085$  (air), 0.000280145 (vacuum), 0.000324166 ( $\text{O}_2$ );  $[\text{Tb}(\text{hfa})_3(\text{tcpo})_2]$ :  $\chi^2 = 0.00260252$  (air), 0.0025958 (vacuum), 0.00204608 ( $\text{O}_2$ )).

**Table S5.** Oxygen-concentration dependent emission lifetimes ( $\lambda_{\text{ex}} = 356 \text{ nm}$ ,  $\lambda_{\text{em}} = 542 \text{ nm}$ , 293 K) of  $[\text{Tb}(\text{hfa})_3(\text{tppo})_2]$ . The average emission lifetimes were obtained through five measurements.

| Condition      | $\tau_1 / \mu\text{s}$ | $\tau_2 / \mu\text{s}$ | $\tau_{\text{avg}} / \mu\text{s}$ |
|----------------|------------------------|------------------------|-----------------------------------|
| air            | 93 (86%)               | 153 (14%)              | 101                               |
| vacuum         | 98 (96%)               | 285 (4%)               | 105                               |
| O <sub>2</sub> | 77 (88%)               | 125 (12%)              | 82                                |

**Table S6.** Oxygen-concentration dependent emission lifetimes ( $\lambda_{\text{ex}} = 356 \text{ nm}$ ,  $\lambda_{\text{em}} = 542 \text{ nm}$ , 293 K) of  $[\text{Tb}(\text{hfa})_3(\text{tcpo})_2]$ . The average emission lifetimes were obtained through five measurements.

| Condition      | $\tau_1 / \mu\text{s}$ | $\tau_2 / \mu\text{s}$ | $\tau_{\text{avg}} / \mu\text{s}$ |
|----------------|------------------------|------------------------|-----------------------------------|
| air            | 140 (15%)              | 507 (85%)              | 453                               |
| vacuum         | 134 (13%)              | 515 (87%)              | 466                               |
| O <sub>2</sub> | 116 (11%)              | 434 (89%)              | 398                               |

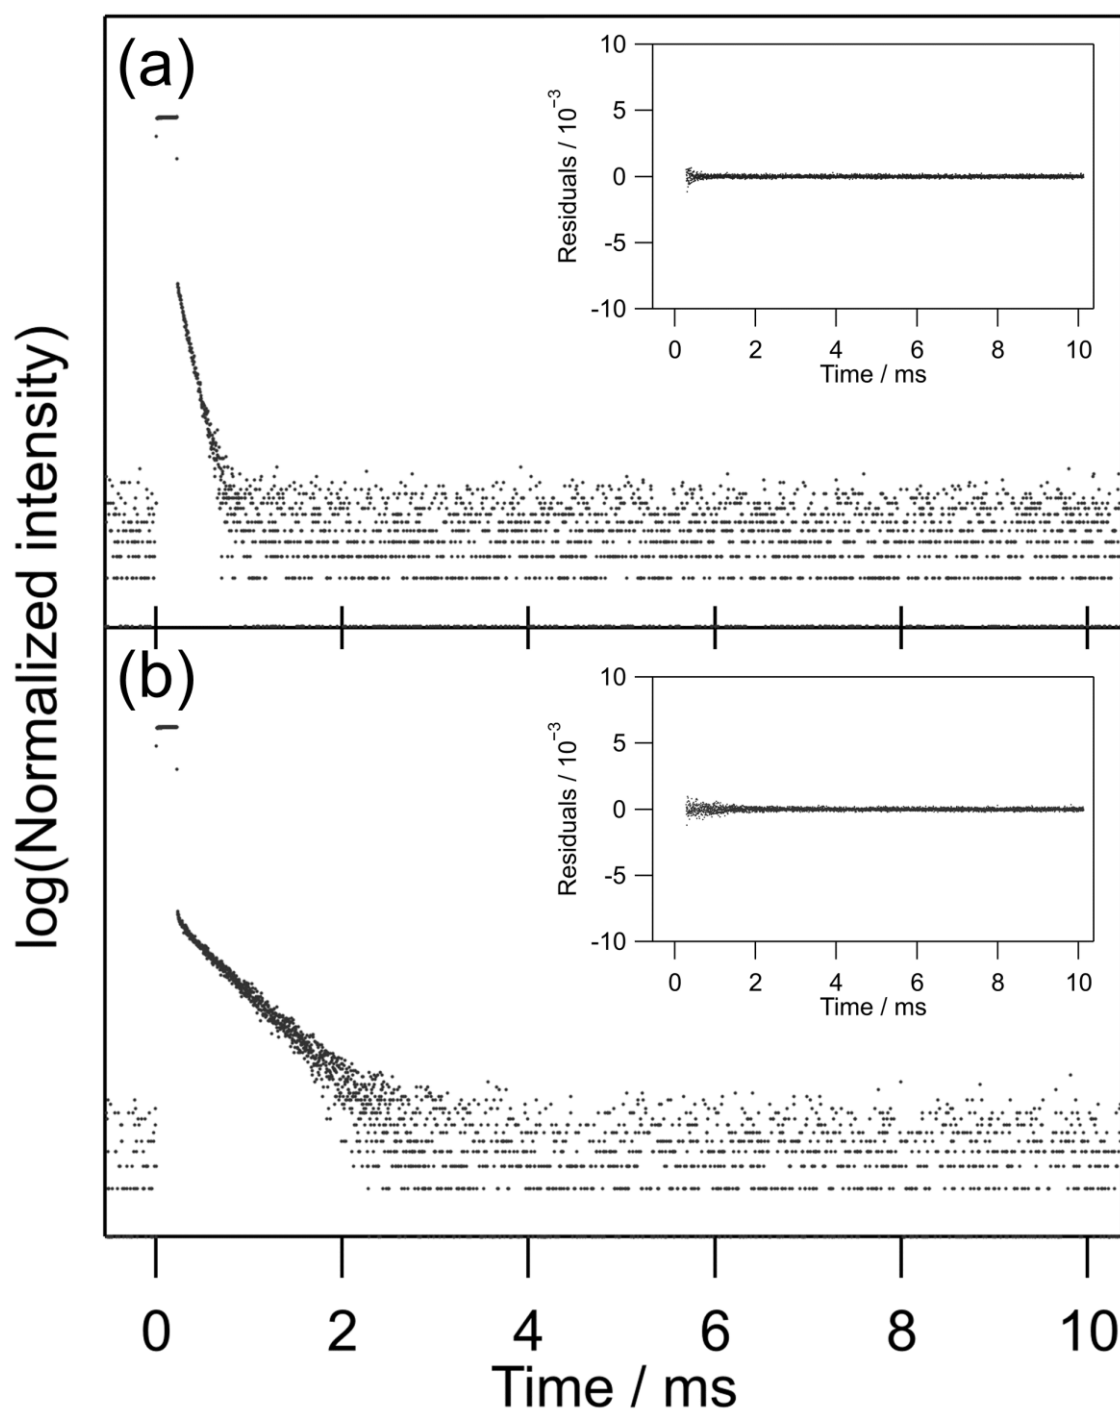

**Figure S6.** Emission decay curves ( $\lambda_{\text{ex}} = 495 \text{ nm}$ ,  $\lambda_{\text{em}} = 542 \text{ nm}$ , 293 K) of (a) [Tb(hfa)<sub>3</sub>(tppo)<sub>2</sub>] and (b) [Tb(hfa)<sub>3</sub>(tcpo)<sub>2</sub>] under vacuum (HORIBA Fluorolog-3). The inset figures represent the residuals of double-exponential fitting (Chi-squared test: [Tb(hfa)<sub>3</sub>(tppo)<sub>2</sub>]  $\chi^2 = 3.16037 \times 10^{-6}$ ; [Tb(hfa)<sub>3</sub>(tcpo)<sub>2</sub>]:  $\chi^2 = 5.2358 \times 10^{-6}$ ).

**Table S7.** Emission lifetimes ( $\lambda_{\text{ex}} = 495$  nm,  $\lambda_{\text{em}} = 542$  nm, 293 K, under vacuum) of  $[\text{Tb}(\text{hfa})_3(\text{tppo})_2]$  and  $[\text{Tb}(\text{hfa})_3(\text{tcpo})_2]$ . The average emission lifetimes were obtained through five measurements.

| Entry                                      | $\tau_1 / \mu\text{s}$ | $\tau_2 / \mu\text{s}$ | $\tau_{\text{avg}} / \mu\text{s}$ |
|--------------------------------------------|------------------------|------------------------|-----------------------------------|
| $[\text{Tb}(\text{hfa})_3(\text{tppo})_2]$ | 77 (59%)               | 133 (41%)              | 99                                |
| $[\text{Tb}(\text{hfa})_3(\text{tcpo})_2]$ | 84 (10%)               | 495 (90%)              | 452                               |

**Table S8.** Temperature-dependent emission lifetimes ( $\lambda_{\text{ex}} = 356$  nm,  $\lambda_{\text{em}} = 542$  nm, under vacuum) of  $[\text{Tb}(\text{hfa})_3(\text{tppo})_2]$ .

| Temperature / K | Single component                  | Double components      |                        |                                   |
|-----------------|-----------------------------------|------------------------|------------------------|-----------------------------------|
|                 | $\tau_{\text{obs}} / \mu\text{s}$ | $\tau_1 / \mu\text{s}$ | $\tau_2 / \mu\text{s}$ | $\tau_{\text{avg}} / \mu\text{s}$ |
| 100             | 763                               | -                      | -                      | -                                 |
| 150             | 772                               | -                      | -                      | -                                 |
| 200             | 742                               | -                      | -                      | -                                 |
| 225             | 625                               | -                      | -                      | -                                 |
| 250             | -                                 | 383 (84%)              | 580 (16%)              | 414                               |
| 275             | -                                 | 203 (92%)              | 501 (8%)               | 226                               |
| 300             | -                                 | 98 (91%)               | 297 (9%)               | 116                               |
| 350             | -                                 | 26 (95%)               | 521 (5%)               | 49                                |

**Table S9.** Temperature-dependent emission lifetimes ( $\lambda_{\text{ex}} = 356$  nm,  $\lambda_{\text{em}} = 542$  nm, under vacuum) of  $[\text{Tb}(\text{hfa})_3(\text{tcpo})_2]$ .

| Temperature / K | Single component                  | Double components      |                        |                                   |
|-----------------|-----------------------------------|------------------------|------------------------|-----------------------------------|
|                 | $\tau_{\text{obs}} / \mu\text{s}$ | $\tau_1 / \mu\text{s}$ | $\tau_2 / \mu\text{s}$ | $\tau_{\text{avg}} / \mu\text{s}$ |
| 100             | 894                               | -                      | -                      | -                                 |
| 150             | 899                               | -                      | -                      | -                                 |
| 200             | 881                               | -                      | -                      | -                                 |
| 250             | -                                 | 349 (15%)              | 858 (85%)              | 781                               |
| 275             | -                                 | 265 (12%)              | 735 (88%)              | 681                               |
| 300             | -                                 | 183 (16%)              | 519 (84%)              | 465                               |
| 325             | -                                 | 142 (21%)              | 497 (79%)              | 254                               |
| 350             | -                                 | 77 (59%)               | 136 (41%)              | 101                               |

### Arrhenius analysis

To analyze the BEnT properties of the Tb(III) complexes, we performed Arrhenius analysis. Since the back energy transfer doesn't occur at 90 K, the BEnT rate ( $k_{\text{BEnT}}$ ) at each temperature can be expressed as follows:

$$\ln k_{\text{BEnT}} = \ln \left( \frac{1}{\tau_{\text{obs}}} - \frac{1}{\tau_{90\text{K}}} \right) = -\frac{E_a}{RT} + A$$

where  $\tau_{\text{obs}}$ ,  $\tau_{90\text{K}}$ ,  $E_a$ ,  $R$ ,  $T$ , and  $A$  are observed emission lifetime at each temperature, emission lifetime at 90 K, activation energy, gas constant, temperature, and frequency factor, respectively.

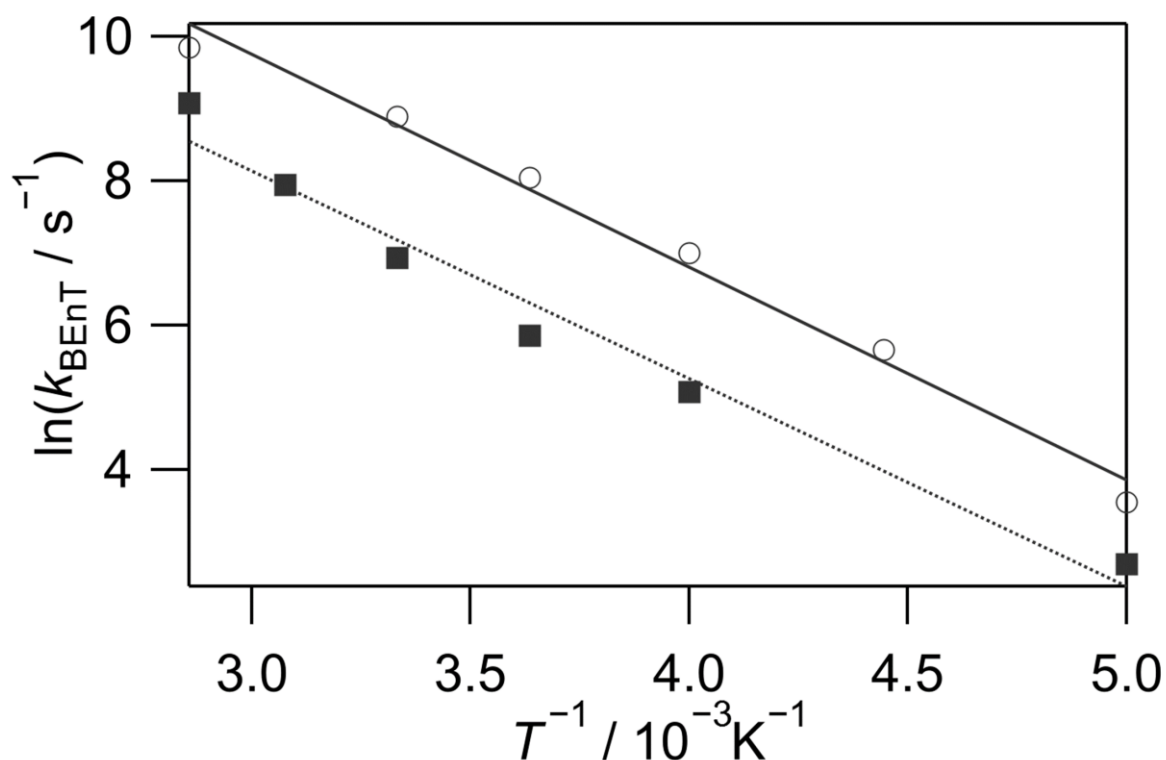

**Figure S7.** Arrhenius plots and fitting lines for [Tb(hfa)<sub>3</sub>(tppo)<sub>2</sub>] (circle and solid line) and [Tb(hfa)<sub>3</sub>(tcpo)<sub>2</sub>] (square and dotted line).

**Table S10.** Arrhenius parameters for [Tb(hfa)<sub>3</sub>(tppo)<sub>2</sub>] and [Tb(hfa)<sub>3</sub>(tcpo)<sub>2</sub>].

| Entry                                       | $A / \text{s}^{-1}$ | $E_a / \text{cm}^{-1}$ |
|---------------------------------------------|---------------------|------------------------|
| [Tb(hfa) <sub>3</sub> (tppo) <sub>2</sub> ] | $1.2 \times 10^8$   | 2,000                  |
| [Tb(hfa) <sub>3</sub> (tcpo) <sub>2</sub> ] | $1.9 \times 10^7$   | 2,000                  |

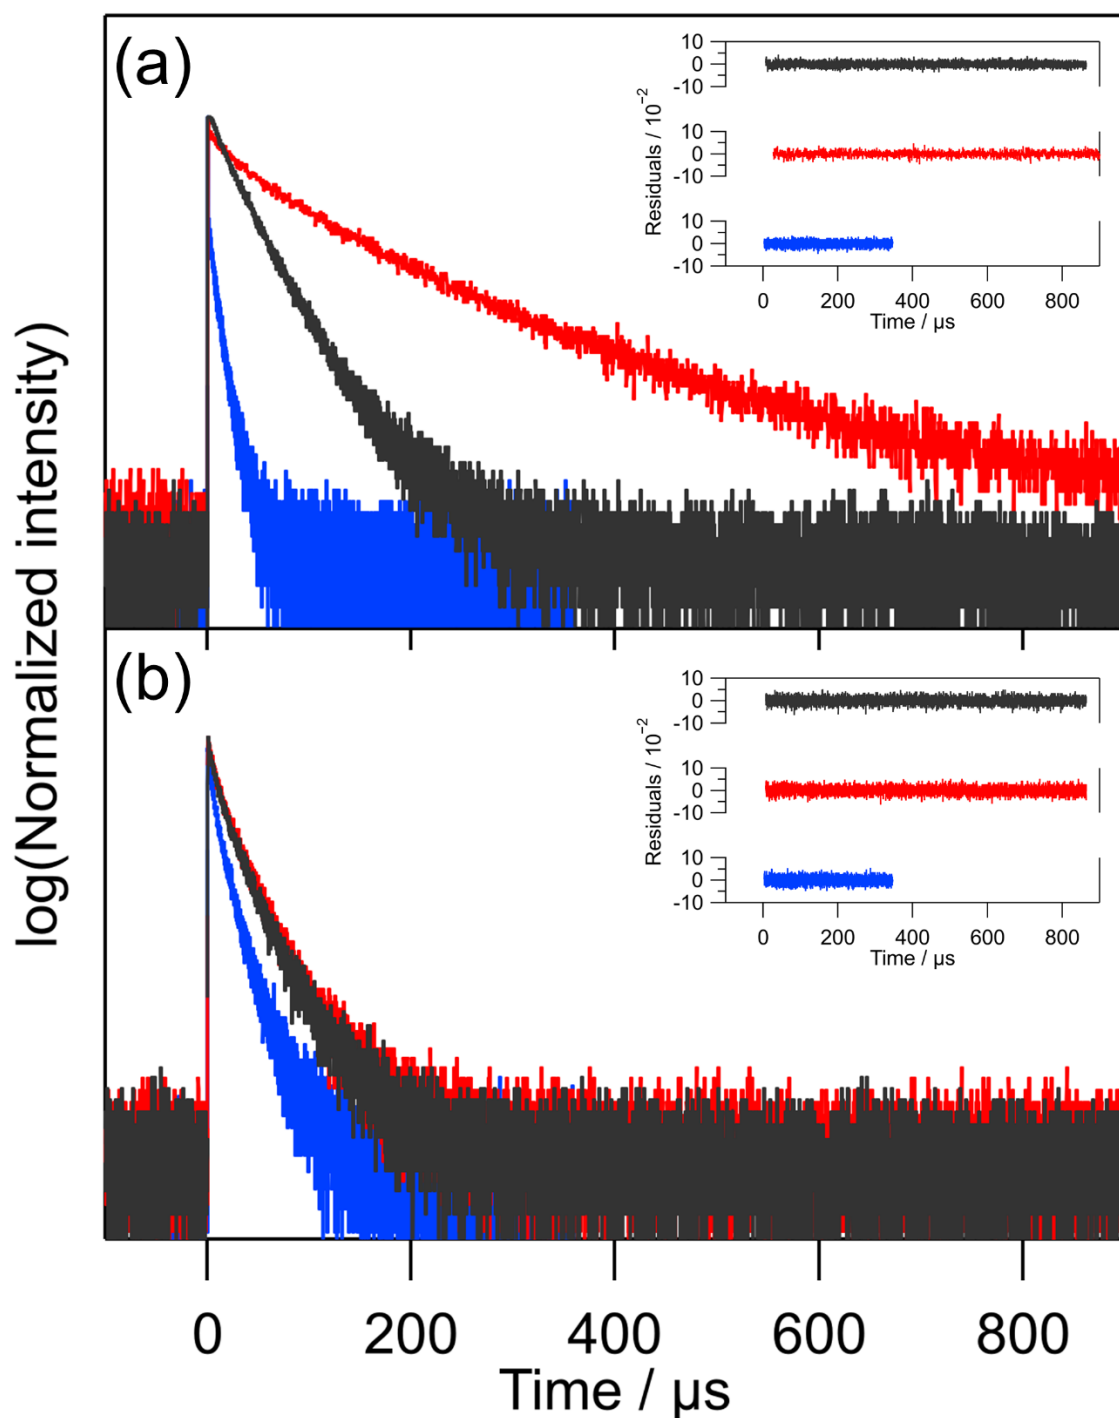

**Figure S8.** Emission decay curves ( $\lambda_{\text{ex}} = 355 \text{ nm}$ ,  $\lambda_{\text{em}} = 500 \text{ nm}$ ,  $293 \text{ K}$ ) of (a)  $[\text{Gd}(\text{hfa})_3(\text{tpo})_2]$  and (b)  $[\text{Gd}(\text{hfa})_3(\text{tcpo})_2]$  under air (black lines), vacuum (red lines), and  $\text{O}_2$  (blue lines) conditions (Nd:YAG laser). The inset figures represent the residuals of double-exponential fitting (Chi-squared test:  $[\text{Gd}(\text{hfa})_3(\text{tpo})_2]$ :  $\chi^2 = 0.88987$  (air),  $1.22826$  (vacuum),  $0.937008$  ( $\text{O}_2$ );  $[\text{Gd}(\text{hfa})_3(\text{tcpo})_2]$ :  $\chi^2 = 1.78777$  (air),  $2.0778$  (vacuum),  $1.47211$  ( $\text{O}_2$ )).

**Table S11.** Oxygen-concentration dependent emission lifetimes ( $\lambda_{\text{ex}} = 355$  nm,  $\lambda_{\text{em}} = 500$  nm, 293 K) of  $[\text{Gd}(\text{hfa})_3(\text{tppo})_2]$ . The average emission lifetimes were obtained through ten measurements.

| Condition      | $\tau_1 / \mu\text{s}$ | $\tau_2 / \mu\text{s}$ | $\tau_{\text{avg}} / \mu\text{s}$ |
|----------------|------------------------|------------------------|-----------------------------------|
| air            | 36 (33%)               | 77 (67%)               | 64                                |
| vacuum         | 88 (25%)               | 287 (75%)              | 237                               |
| O <sub>2</sub> | 11 (40%)               | 19 (60%)               | 16                                |

**Table S12.** Oxygen-concentration dependent emission lifetimes ( $\lambda_{\text{ex}} = 355$  nm,  $\lambda_{\text{em}} = 500$  nm, 293 K) of  $[\text{Gd}(\text{hfa})_3(\text{tcpo})_2]$ . The average emission lifetimes were obtained through ten measurements.

| Condition      | $\tau_1 / \mu\text{s}$ | $\tau_2 / \mu\text{s}$ | $\tau_{\text{avg}} / \mu\text{s}$ |
|----------------|------------------------|------------------------|-----------------------------------|
| air            | 22 (26%)               | 60 (74%)               | 50                                |
| vacuum         | 26 (31%)               | 64 (69%)               | 52                                |
| O <sub>2</sub> | 10 (25%)               | 36 (75%)               | 29                                |



## Quantum chemical calculations

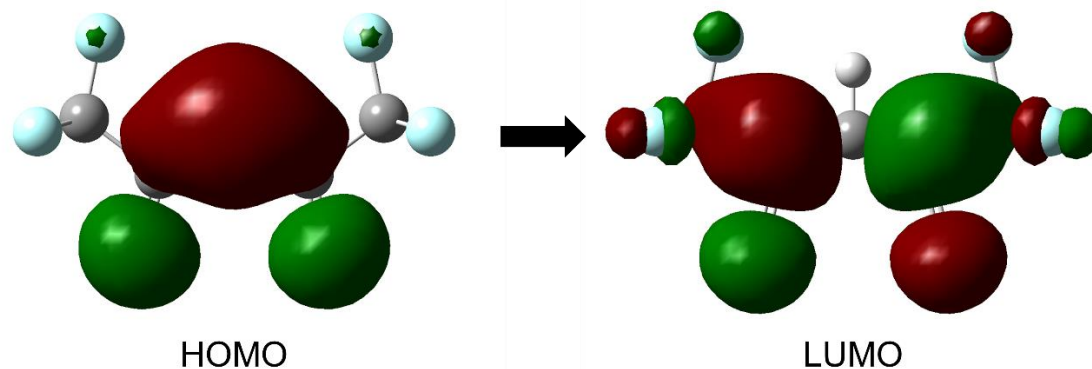

**Figure S9.** Molecular orbitals involved in the transition to the  $T_1$  state in hfa ligands (B3LYP / aug-cc-pVDZ). This structure was obtained from DFT calculation (B3LYP / aug-cc-pVDZ).

**Table S13.** Polarizability of the ligands in  $[\text{Tb}(\text{hfa})_3(\text{tppo})_2]$  and  $[\text{Tb}(\text{hfa})_3(\text{tcpo})_2]$ .

| Entry                                    | Ligand | $\alpha / \text{Bohr}^3$ | $R / \text{\AA}$     | $\alpha^2 / \text{Bohr}^6$ | $R^{-8} / \text{\AA}^{-8}$ | $\Sigma \alpha^2 R^{-8} / \text{Bohr}^6 \text{\AA}^{-8}$ |
|------------------------------------------|--------|--------------------------|----------------------|----------------------------|----------------------------|----------------------------------------------------------|
| Tb(hfa) <sub>3</sub> (tppo) <sub>2</sub> | hfa1   | 57.14                    | 2.369 <sup>[a]</sup> | 3265                       | $1.008 \times 10^{-3}$     | 101.4                                                    |
|                                          | hfa2   | 56.95                    | 2.381 <sup>[a]</sup> | 3243                       | $9.697 \times 10^{-4}$     |                                                          |
|                                          | hfa3   | 57.25                    | 2.399 <sup>[a]</sup> | 3278                       | $9.115 \times 10^{-4}$     |                                                          |
|                                          | PO1    | 180.81                   | 2.271 <sup>[b]</sup> | 32692                      | $1.413 \times 10^{-3}$     |                                                          |
|                                          | PO2    | 180.90                   | 2.274 <sup>[b]</sup> | 32725                      | $1.399 \times 10^{-3}$     |                                                          |
|                                          | Avg.   | 106.61                   | 2.339                | 15041                      | $1.140 \times 10^{-3}$     |                                                          |
| Tb(hfa) <sub>3</sub> (tcpo) <sub>2</sub> | hfa1   | 57.26                    | 2.413 <sup>[a]</sup> | 3279                       | $8.700 \times 10^{-4}$     | 106.1                                                    |
|                                          | hfa2   | 57.38                    | 2.393 <sup>[a]</sup> | 3292                       | $9.299 \times 10^{-4}$     |                                                          |
|                                          | hfa3   | 57.71                    | 2.414 <sup>[a]</sup> | 3330                       | $8.686 \times 10^{-4}$     |                                                          |
|                                          | PO1    | 182.64                   | 2.264 <sup>[b]</sup> | 33357                      | $1.449 \times 10^{-3}$     |                                                          |
|                                          | PO2    | 183.44                   | 2.263 <sup>[b]</sup> | 33650                      | $1.454 \times 10^{-3}$     |                                                          |
|                                          | Avg.   | 107.69                   | 2.349                | 15382                      | $1.114 \times 10^{-3}$     |                                                          |

ULC-BLYP / cc-pVDZ. The single crystal structures were used for the calculations.

PO: Phosphine oxide ligand.

[a] Average of two Tb-O distances.

[b] Tb-O distance.

**Table S14.** Energy levels and oscillator strengths of LMCT states in [Tb(hfa)<sub>3</sub>(tppo)<sub>2</sub>].

|        | Excited state | $\lambda$ / nm | $E_{CT}$ / cm <sup>-1</sup> | $f_{CT}$ | $E_{CT}^{-3}$ / cm <sup>3</sup> | $E_{CT}^{-3}f_{CT}$ / cm <sup>3</sup> |
|--------|---------------|----------------|-----------------------------|----------|---------------------------------|---------------------------------------|
| LMCT1  | 63            | 194.95         | 51295                       | 0.0001   | $7.41 \times 10^{-15}$          | $7.41 \times 10^{-19}$                |
| LMCT2  | 65            | 194.40         | 51440                       | 0.0028   | $7.35 \times 10^{-15}$          | $2.06 \times 10^{-17}$                |
| LMCT3  | 66            | 193.26         | 51744                       | 0.0013   | $7.22 \times 10^{-15}$          | $9.38 \times 10^{-18}$                |
| LMCT4  | 67            | 192.30         | 52002                       | 0.0011   | $7.11 \times 10^{-15}$          | $7.82 \times 10^{-18}$                |
| LMCT5  | 68            | 191.37         | 52255                       | 0.0014   | $7.01 \times 10^{-15}$          | $9.81 \times 10^{-18}$                |
| LMCT6  | 69            | 190.90         | 52383                       | 0.0023   | $6.96 \times 10^{-15}$          | $1.60 \times 10^{-17}$                |
| LMCT7  | 70            | 190.42         | 52515                       | 0.0006   | $6.90 \times 10^{-15}$          | $4.14 \times 10^{-18}$                |
| LMCT8  | 71            | 189.47         | 52779                       | 0.0010   | $6.80 \times 10^{-15}$          | $6.80 \times 10^{-18}$                |
| LMCT9  | 72            | 189.11         | 52879                       | 0.0006   | $6.76 \times 10^{-15}$          | $4.06 \times 10^{-18}$                |
| LMCT10 | 80            | 179.45         | 55726                       | 0.0061   | $5.78 \times 10^{-15}$          | $3.53 \times 10^{-17}$                |
| LMCT11 | 81            | 178.73         | 55950                       | 0.0003   | $5.71 \times 10^{-15}$          | $1.71 \times 10^{-18}$                |
| LMCT12 | 82            | 178.48         | 56029                       | 0.0107   | $5.69 \times 10^{-15}$          | $6.08 \times 10^{-17}$                |
| LMCT13 | 86            | 177.79         | 56246                       | 0.0026   | $5.62 \times 10^{-15}$          | $1.46 \times 10^{-17}$                |
| LMCT14 | 87            | 177.61         | 56303                       | 0.0045   | $5.60 \times 10^{-15}$          | $2.52 \times 10^{-17}$                |
| LMCT15 | 88            | 177.12         | 56459                       | 0.0228   | $5.56 \times 10^{-15}$          | $1.27 \times 10^{-16}$                |
| LMCT16 | 90            | 176.72         | 56587                       | 0.0143   | $5.52 \times 10^{-15}$          | $7.89 \times 10^{-17}$                |
| LMCT17 | 92            | 176.24         | 56741                       | 0.0306   | $5.47 \times 10^{-15}$          | $1.68 \times 10^{-16}$                |
| LMCT18 | 95            | 175.75         | 56899                       | 0.1184   | $5.43 \times 10^{-15}$          | $6.43 \times 10^{-16}$                |
| LMCT19 | 96            | 175.73         | 56905                       | 0.1459   | $5.43 \times 10^{-15}$          | $7.92 \times 10^{-16}$                |
| LMCT20 | 97            | 175.66         | 56928                       | 0.0156   | $5.42 \times 10^{-15}$          | $8.46 \times 10^{-17}$                |
| Avg.   |               | 183.77         | 54503                       | 0.0192   | $6.24 \times 10^{-15}$          | $1.05 \times 10^{-16}$                |

ULC-BLYP / Stuttgart RSC 1997 for Tb atom, cc-pVDZ for C, H, O, F, and P atoms.

**Table S15.** Energy levels and oscillator strengths of LMCT states in [Tb(hfa)<sub>3</sub>(tcpo)<sub>2</sub>].

|        | Excited state | $\lambda / \text{nm}$ | $E_{\text{CT}}/\text{cm}^{-1}$ | $f_{\text{CT}}$ | $E_{\text{CT}}^{-3} / \text{cm}^3$ | $E_{\text{CT}}^{-3}f_{\text{CT}} / \text{cm}^3$ |
|--------|---------------|-----------------------|--------------------------------|-----------------|------------------------------------|-------------------------------------------------|
| LMCT1  | 28            | 197.82                | 50551                          | 0.0024          | $7.74 \times 10^{-15}$             | $1.86 \times 10^{-17}$                          |
| LMCT2  | 29            | 197.64                | 50597                          | 0.0014          | $7.72 \times 10^{-15}$             | $1.08 \times 10^{-17}$                          |
| LMCT3  | 30            | 196.72                | 50834                          | 0.0013          | $7.61 \times 10^{-15}$             | $9.90 \times 10^{-18}$                          |
| LMCT4  | 31            | 193.93                | 51565                          | 0.0020          | $7.29 \times 10^{-15}$             | $1.46 \times 10^{-17}$                          |
| LMCT5  | 32            | 193.42                | 51701                          | 0.0034          | $7.24 \times 10^{-15}$             | $2.46 \times 10^{-17}$                          |
| LMCT6  | 33            | 192.75                | 51881                          | 0.0019          | $7.16 \times 10^{-15}$             | $1.36 \times 10^{-17}$                          |
| LMCT7  | 34            | 192.31                | 51999                          | 0.0004          | $7.11 \times 10^{-15}$             | $2.84 \times 10^{-18}$                          |
| LMCT8  | 35            | 191.76                | 52149                          | 0.0004          | $7.05 \times 10^{-15}$             | $2.82 \times 10^{-18}$                          |
| LMCT9  | 36            | 190.39                | 52524                          | 0.0005          | $6.90 \times 10^{-15}$             | $3.45 \times 10^{-18}$                          |
| LMCT10 | 45            | 182.20                | 54885                          | 0.0007          | $6.05 \times 10^{-15}$             | $4.23 \times 10^{-18}$                          |
| LMCT11 | 46            | 182.00                | 54945                          | 0.0030          | $6.03 \times 10^{-15}$             | $1.81 \times 10^{-17}$                          |
| LMCT12 | 47            | 181.04                | 55236                          | 0.0052          | $5.93 \times 10^{-15}$             | $3.09 \times 10^{-17}$                          |
| LMCT13 | 48            | 180.49                | 55405                          | 0.0028          | $5.88 \times 10^{-15}$             | $1.65 \times 10^{-17}$                          |
| LMCT14 | 49            | 179.80                | 55617                          | 0.0006          | $5.81 \times 10^{-15}$             | $3.49 \times 10^{-18}$                          |
| LMCT15 | 50            | 179.16                | 55816                          | 0.0006          | $5.75 \times 10^{-15}$             | $3.45 \times 10^{-18}$                          |
| LMCT16 | 51            | 179.11                | 55832                          | 0.0009          | $5.75 \times 10^{-15}$             | $5.17 \times 10^{-18}$                          |
| LMCT17 | 52            | 178.69                | 55963                          | 0.0014          | $5.71 \times 10^{-15}$             | $7.99 \times 10^{-18}$                          |
| LMCT18 | 53            | 178.48                | 56029                          | 0.0004          | $5.69 \times 10^{-15}$             | $2.27 \times 10^{-18}$                          |
| LMCT19 | 54            | 177.63                | 56297                          | 0.0029          | $5.60 \times 10^{-15}$             | $1.63 \times 10^{-17}$                          |
| LMCT20 | 56            | 176.92                | 56523                          | 0.0023          | $5.54 \times 10^{-15}$             | $1.27 \times 10^{-17}$                          |
| Avg.   |               | 186.11                | 53817                          | 0.0017          | $6.48 \times 10^{-15}$             | $1.11 \times 10^{-17}$                          |

ULC-BLYP / Stuttgart RSC 1997 for Tb atom, cc-pVDZ for C, H, O, F, and P atoms.

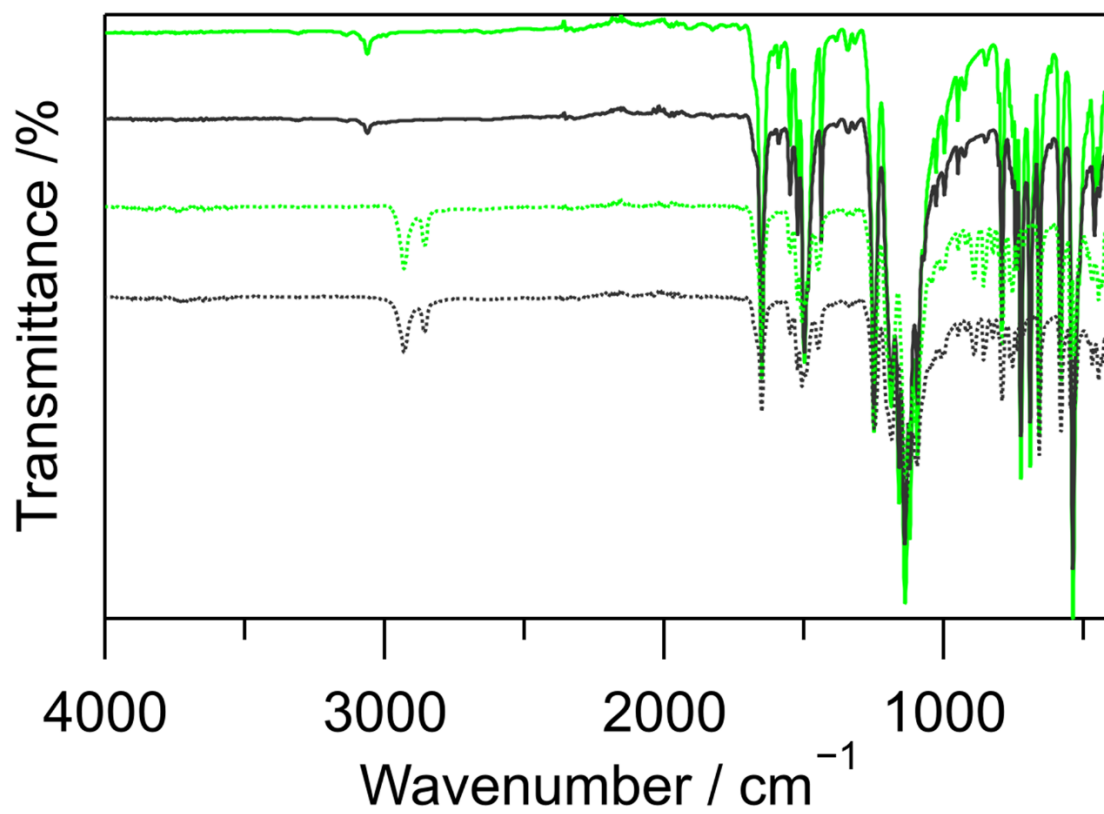

**Figure S10.** FT-IR spectra of the Tb(III) (green lines) and Gd(III) (black lines) complexes: [Ln(hfa)<sub>3</sub>(tppo)<sub>2</sub>] (solid lines), [Ln(hfa)<sub>3</sub>(tcpo)<sub>2</sub>] (dotted lines).

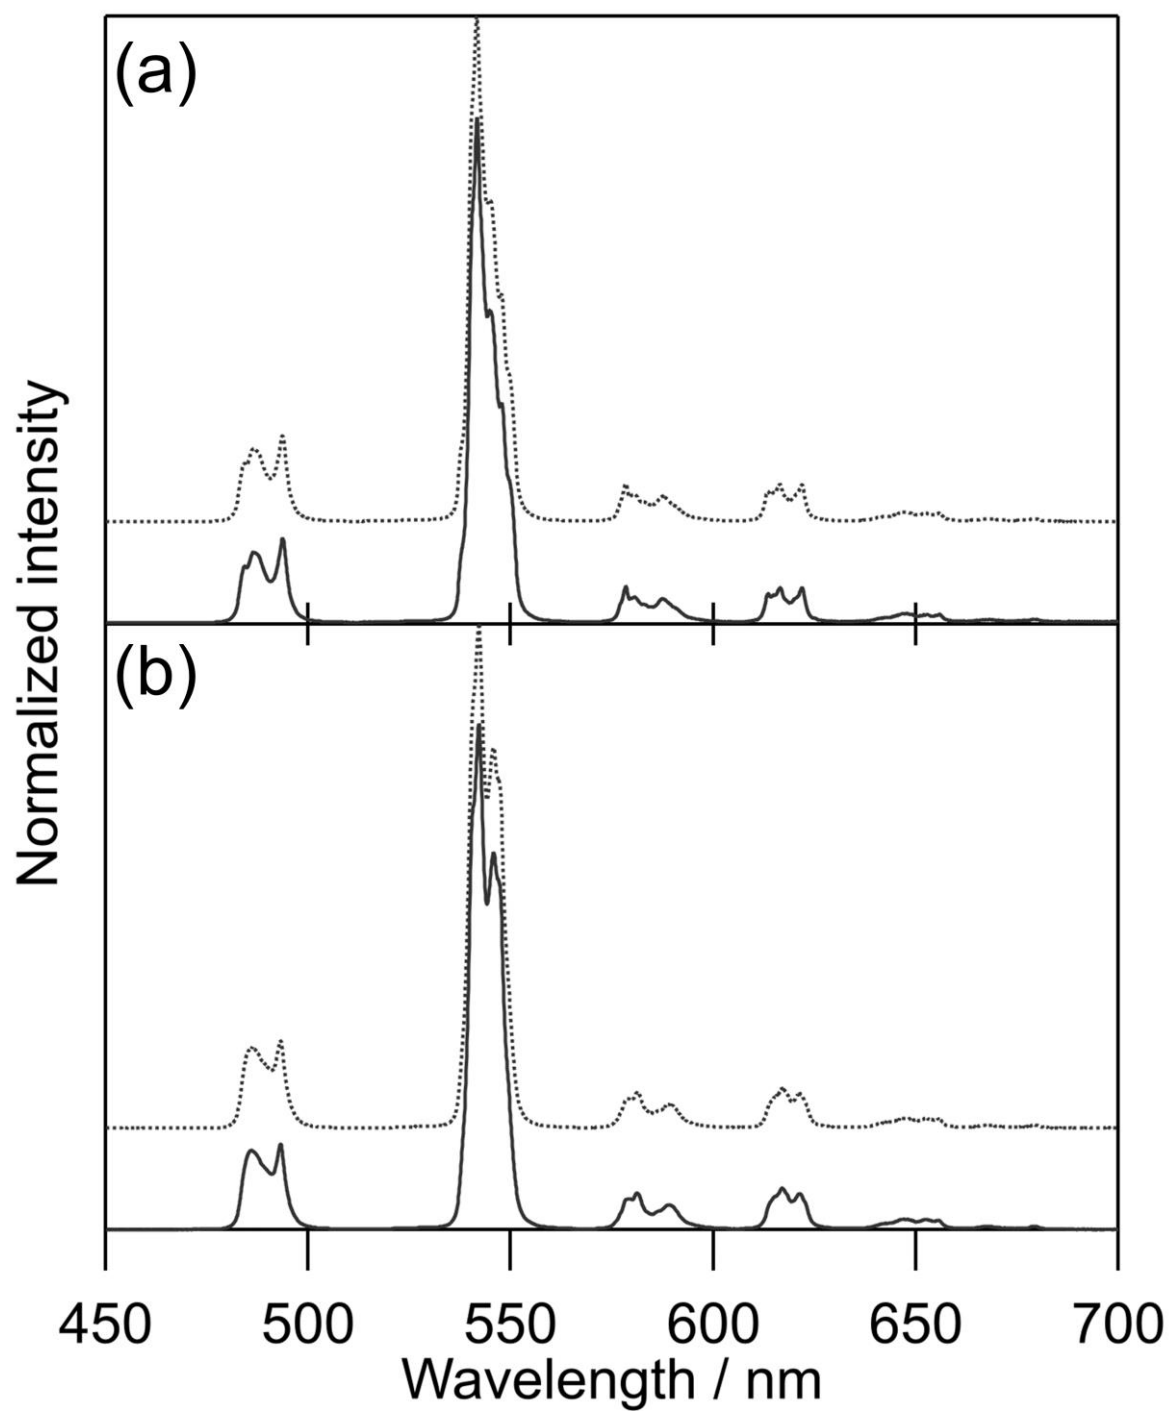

**Figure S11.** Emission spectra ( $\lambda_{\text{ex}} = 360$  nm, 293 K) of (a) [Tb(hfa)<sub>3</sub>(tppo)<sub>2</sub>] and (b) [Tb(hfa)<sub>3</sub>(tcpo)<sub>2</sub>] in air (dotted lines) and under vacuum (solid lines).

## References

1. David Casanova, Miquel Llunell, Pere Alemany, and Santiago Alvarez, *Chem. Eur. J.*, 2005, **11**, 1479–1494.
2. Mark Pinsky and David Avnir, *Inorg. Chem.*, 1998, **37**, 5575–5582.
3. SHAPE, version 2.1. Continuous shape measures calculations. Electronic Structure Group, Universitat de Barcelona: Spain (2010).
4. J. C. G. Bünzli and S. V. Eliseeva, Basics of lanthanide photophysics, *Lanthanide Luminescence*, P. Hänninen and H. Härmä, Springer Berlin Heidelberg, 2010, vol. 7, 1–45.
